# Supplementary material
Source: PubMed Central journal article supplement (PMC7163774)
Supplement: JOA-236-883-s001.pdf [file JOA-236-883-s001.pdf]

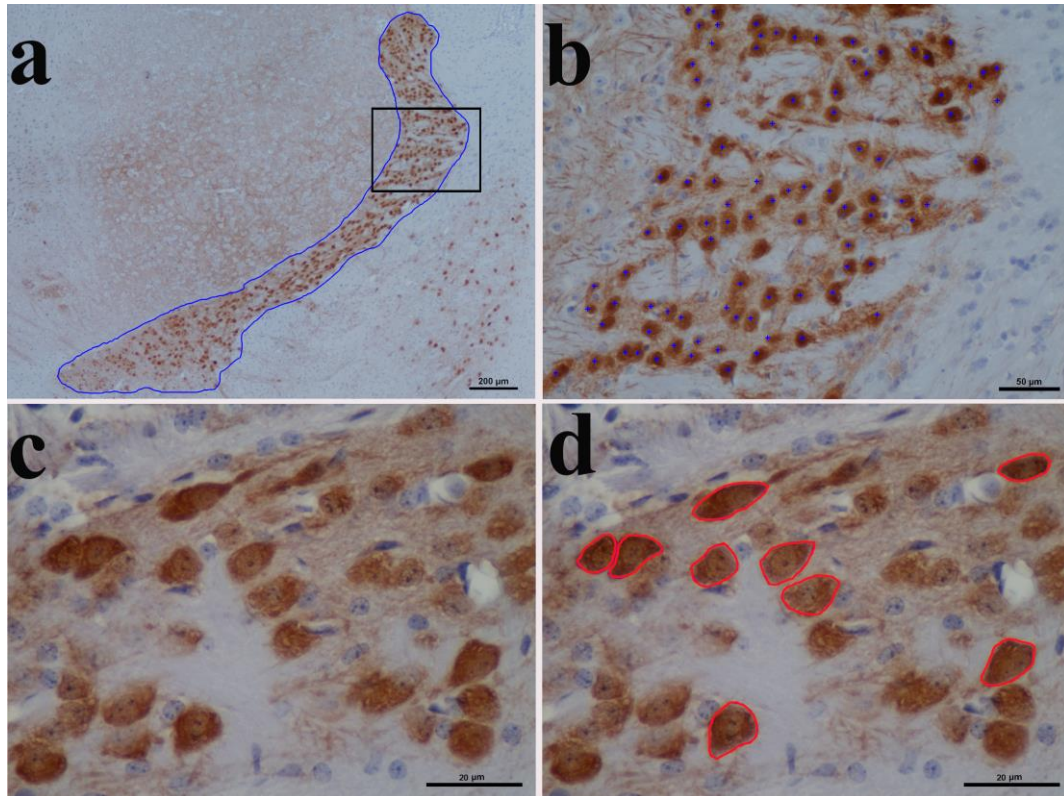

Figure S1: representative images of the anti-PV immunostained Rt that show the morphometrical analysis process. a) the image-processing software automatically calculated Rt area encircled by the manually traced perimeter; b) PV-immunopositive cells were manually counted; c) high magnification showing PV-immunoreactive neurons inside Rt; d) only cells showing a visible nucleus and nucleolus were traced for cell area, shape factor and circularity measurement.
